# Supplementary material for: SPOP regulates the expression profiles and alternative splicing events in human hepatocytes
Source: Open Life Sci. 2023 Oct 24;18(1):20220755. doi: 10.1515/biol-2022-0755 (PMC10628592; doi:10.1515/biol-2022-0755)
Supplement: Supplementary Table S7 [file Supplementary-Table-S7.xlsx]

## Sheet: Sheet1
Colony-forming assay
vec	SPOP
141	323
152	316
149	285
