# Supplementary material for: SPOP regulates the expression profiles and alternative splicing events in human hepatocytes
Source: Open Life Sci. 2023 Oct 24;18(1):20220755. doi: 10.1515/biol-2022-0755 (PMC10628592; doi:10.1515/biol-2022-0755)
Supplement: Supplementary Table S8 [file Supplementary-Table-S8.xlsx]

## Sheet: Sheet1
qPCR results
	log2FoldChange from RNA-Seq	log2FoldChange from PCR
CALU	0.325967	0.83
CCNA1	1.81924	2.36
CCNA2	0.274688	0.441667
CCNC	0.359668	0.73
CDK1	0.224048	0.473333
CDK4	-0.293591	-0.596667
CDK6	0.879563	0.606667
FXR1	0.28506	0.308333
GIGYF1	-0.217062	-0.786667
KIAA1522	-0.312976	-0.65
KRAS	0.497248	0.551667
MYBL2	-0.448741	-1.09
PAPOLG	0.506369	2.375
PER1	-0.495764	-1.36833
PRKAG2	0.544811	0.781667
SOX12	-0.303742	-1.935
TP53	-0.395111	-1.31333
XPO1	0.24887	0.981667
